# Supplementary material
Source: PubMed Central journal article supplement (PMC3478647)
Supplement: 1213790109_pnas.201213790SI.pdf [file 1213790109_pnas.201213790SI.pdf]

# Supporting Information

Hurt et al. 10.1073/pnas.1213790109

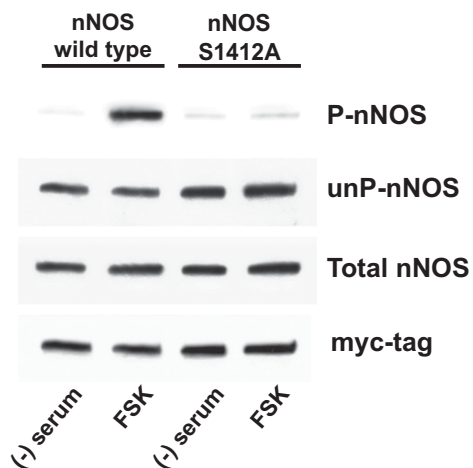

**Fig. S1.** Peptide antisera to phosphorylated and unphosphorylated neuronal NO synthase (nNOS) serine 1412 are sensitive and highly selective. LnCaP cells were transfected for 24 h with wild-type or S1412A myc-tagged nNOS, serum-starved for 24 h, then stimulated with forskolin (FSK) for 10 min before lysis. Unphospho-S1412-nNOS (UnP-nNOS) antibody shows a slight decrease for preparations with increased phospho-S1412-nNOS (P-nNOS), but total nNOS (commercial anti-N-terminus nNOS antibody) and anti-myc antibodies show even expression.

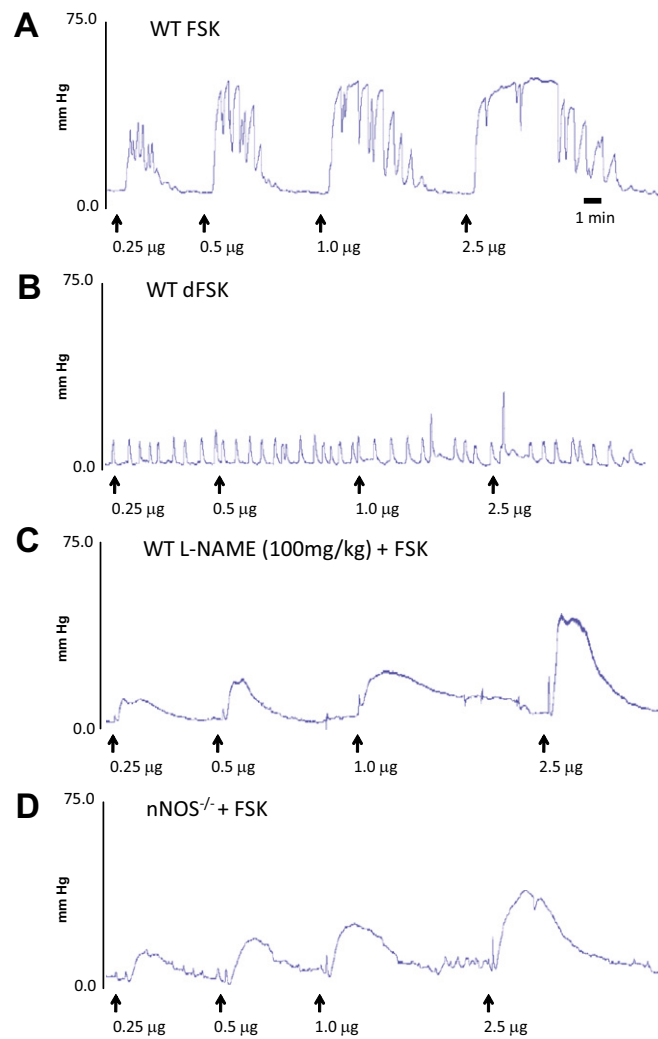

**Fig. S2.** (A–D) Representative tracings show overall dose-response for intracavernosal injection of FSK or deoxy-FSK (dFSK) in wild-type and  $nNOS\alpha^{-/-}$  mice. Increased intracavernosal pressure (ICP) is recorded after injecting the indicated amount of FSK or dFSK in wild-type or  $nNOS\alpha^{-/-}$  mice, or in WT mice pretreated with 100 mg/kg L-nitro-arginine-methylester (L-NAME). Responses to FSK injection are similar in L-NAME-treated wild-type and  $nNOS\alpha^{-/-}$  animals.

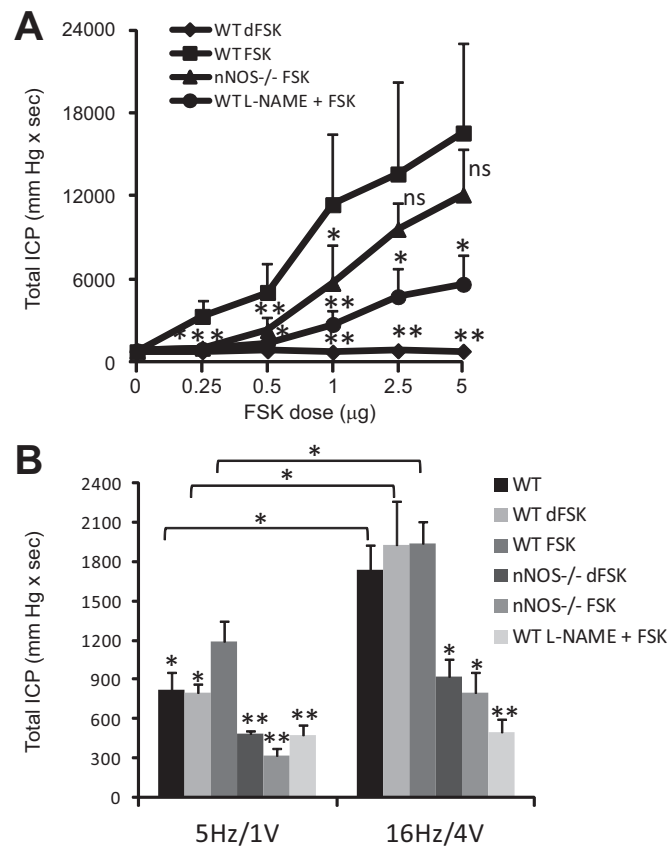

**Fig. S3.** (A and B) Total area under the curve (AUC; total ICP) for the experiments presented in Fig. 5. AUC analysis gives similar results as for maximal ICP. At low doses, intracavernosal FSK effects are inhibited by L-NAME and by nNOS $\alpha$  deletion. FSK also increases the response to submaximal cavernous nerve stimulation, but that effect is absent in nNOS $\alpha$ <sup>-/-</sup> mice and in wild-type mice pretreated with L-NAME. Because the effect of the general NOS inhibitor, L-NAME, is the same as the effect in nNOS $\alpha$ <sup>-/-</sup> mice, the FSK changes in ICP are likely mediated by nNOS rather than eNOS. Data are mean  $\pm$  SE for  $n = 6$ –9 animals. \* $P < 0.05$  vs. wild-type FSK; \*\* $P < 0.001$  vs. wild-type FSK. For 5 Hz vs. 16 Hz comparisons, \* $P < 0.05$  by Student's  $t$  test. ns, not significant.
